Table S1. Metabolic rate (MR) conditions that were used to calculate aerobic dive limits of *Mesoplodon* spp. and *Globicephala macrorhynchus*

| Species                                       | Animal condition at time of measurement                                      | Source                                    |
|-----------------------------------------------|------------------------------------------------------------------------------|-------------------------------------------|
| Leptonychotes weddellii (387.4 kg individual) | Lowest MR after dive <23 min                                                 | Williams et al., 2004                     |
| Leptonychotes weddellii (450 kg individual)   | Calculated based on organ MR of rat/human scaled to weight of seal           | Davis and Kanatous, 1999                  |
| Mammal                                        | Basal MR                                                                     | Kleiber, 1975                             |
| <i>Mesoplodon densirostris</i>                | Calculated using COT and average vertical velocity of 1.15 m s <sup>-1</sup> | Williams et al., 2011; Tyack et al., 2006 |
| <i>Globicephala macrorhynchus</i>             | Calculated using COT and average vertical velocity of 2.1 m s <sup>-1</sup>  | Williams et al., 2011; Soto et al., 2008  |
| <i>Globicephala macrorhynchus</i>             | Calculated using COT and average sprint speed of 4 m s <sup>-1</sup>         | Williams et al., 2011; Soto et al., 2008  |
| <i>Tursiops truncatus</i> (145 kg individual) | Pushing against a load cell at full exertion                                 | Williams et al., 1993                     |
| COT, cost of transport.                       |                                                                              |                                           |

Table S2. Mean ( $\pm$ s.d.) percent of Type I fibers by area and myoglobin concentration for a subadult *Globicephala macrorhynchus* (used for mitochondrial volume density measurement) and relative percentage of mean adult value for each measurement

|                                          | Subadult <i>G. macrorhynchus</i> | % of mean adult value |
|------------------------------------------|----------------------------------|-----------------------|
| % Type I fibers (alkaline myosin ATPase) | 67.3 $\pm$ 9.9                   | 108                   |
| % Type I fibers (acidic myosin ATPase)   | 68.3 $\pm$ 10.7                  | 104                   |
| [Mb] (g Mb 100 g <sup>-1</sup> tissue)   | 6.88 $\pm$ 0.29                  | 100                   |
